# Supplementary figures and images for: Population and dyadic-based seroincidence of herpes simplex virus-2 and syphilis in southern India
Source: HighWire-hosted journal article supplement (doi:10.1136/sextrans-2014-051708), 2015-01-20

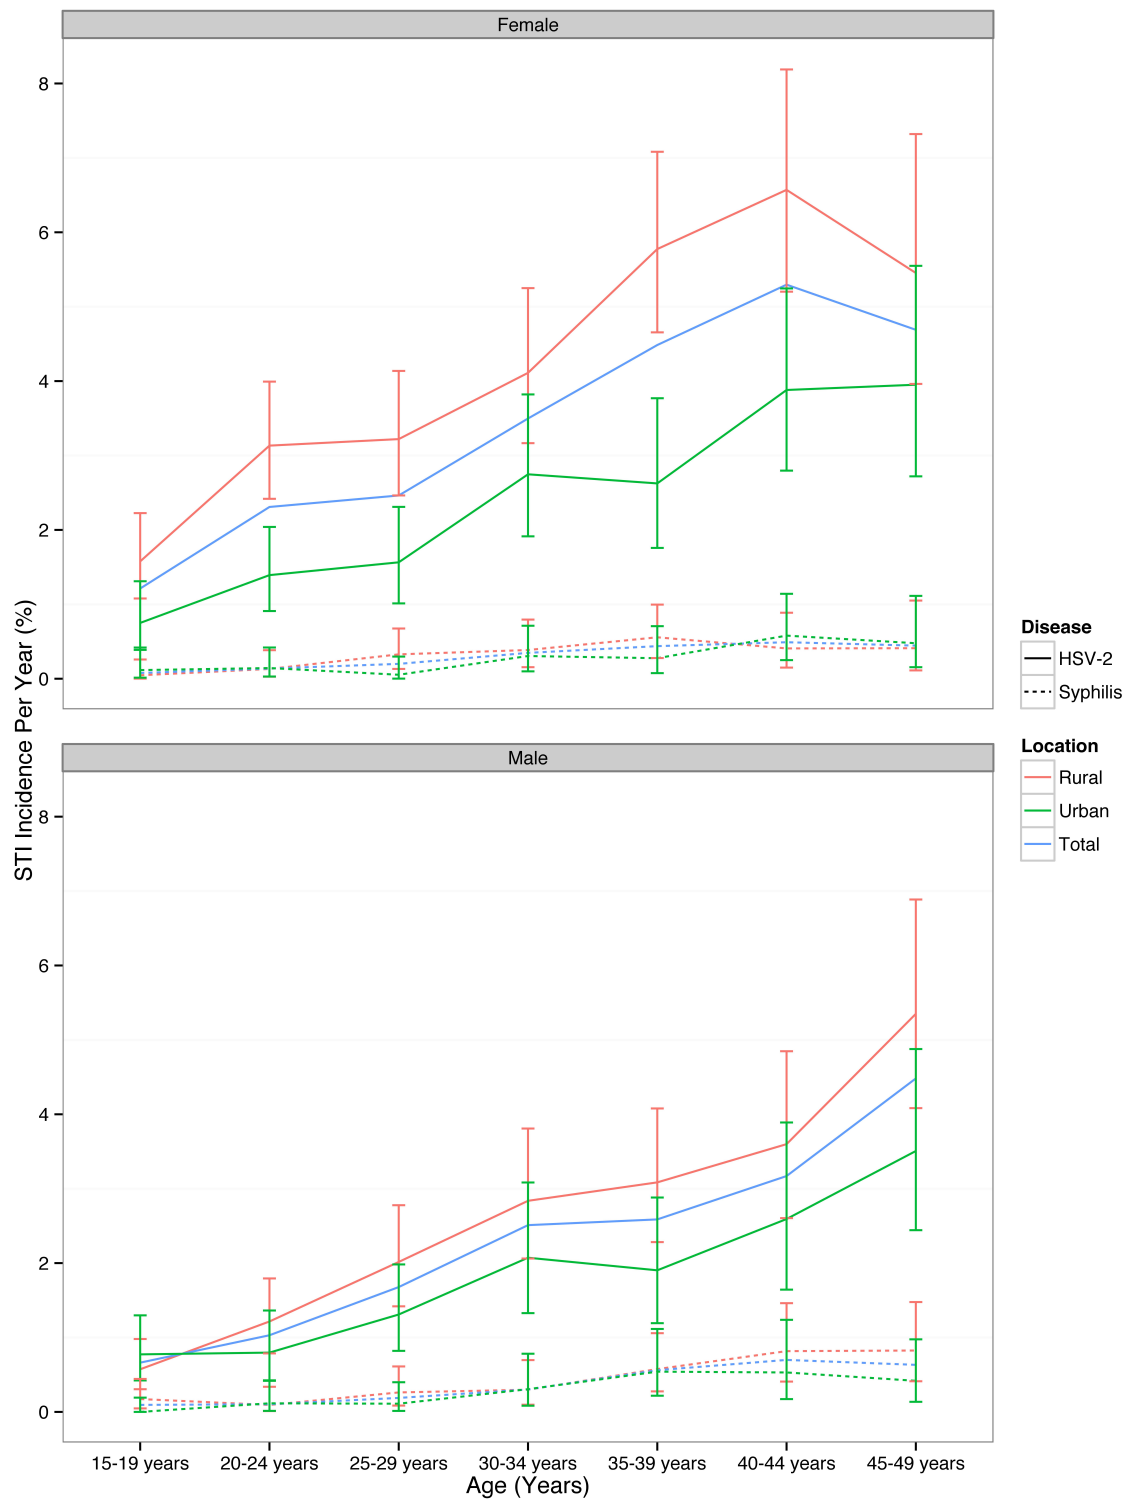

**Figure 1.** Incident HSV-2 and syphilis serostatus in South India from 2004-2005 to 2010-2011.

Supplement: sextrans-2014-051708supp_figure.pdf [file sextrans-2014-051708supp_figure.pdf]
